# Supplementary material for: Carbamoyl-N-aryl-imine-urea: a new framework to obtain a putative leishmanicidal drug-candidate
Source: Royal Society of Chemistry journal article supplement (doi:10.1039/d0ra00287a), 2020-01-01
Supplement: d0ra00287a1.pdf [file d0ra00287a1.pdf]

## Supporting Information

# Carbamoyl-*N*-aryl-imine-urea: A new framework to obtain a putative leishmanicidal drug-candidate

*Marina A. Alves*<sup>1,2‡</sup>, *Aline C. de Queiroz*<sup>3‡</sup>, *Anderson Brandão Leite*<sup>3</sup>, *Felipe T.*

*Martins*<sup>4</sup>, *Antonio C. Doriguetto*<sup>4</sup>, *Eliezer J. Barreiro*<sup>1,2</sup>, *Magna S. Alexandre-Moreira*<sup>3</sup>,

*Lídia M. Lima*<sup>1,2\*</sup>

### Contents of SI

1 – <sup>1</sup>H and <sup>13</sup>C NMR Spectra, IR Spectra and HRMS analyses of Carbamoyl-*N*-aryl-imine-urea (9a-e)

2 – <sup>1</sup>H and <sup>13</sup>C NMR Spectra, IR Spectra and HRMS analyses of Carbamoyl-*N*-aryl-imine-urea (10a-e)

3- Table S1. Crystal data and refinement parameters of compound 9a (LASSBio-1491).

4- Chemical stability pH 7.4

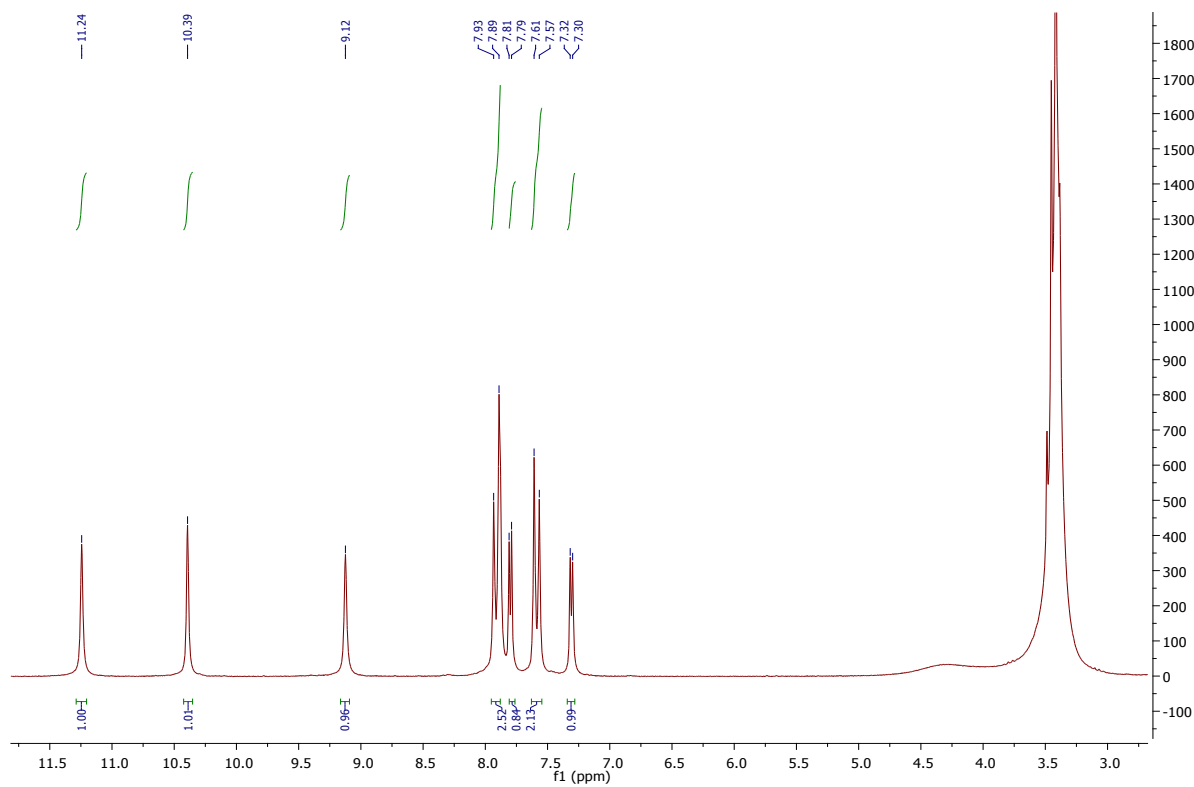Figure S1. Compound 9a (LASSBio-1491) <sup>1</sup>H NMR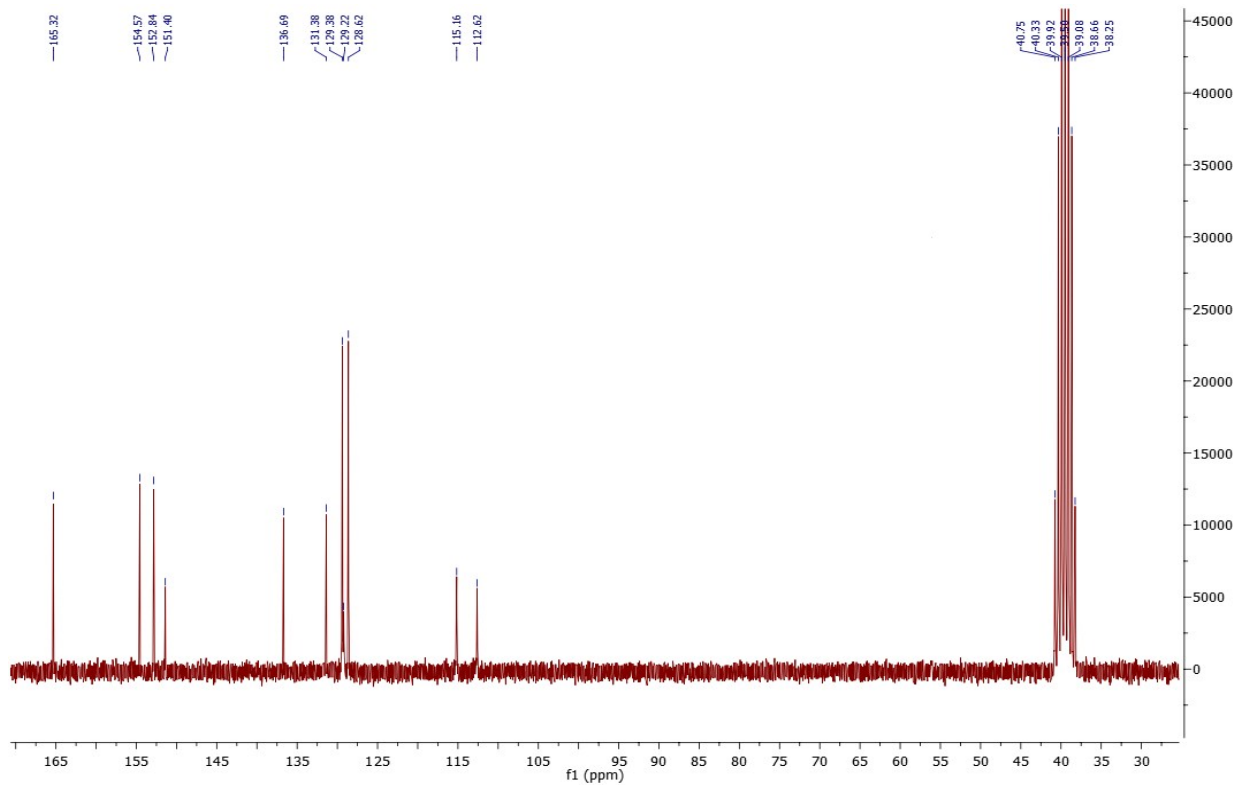Figure S2. Compound 9a (LASSBio-1491) <sup>13</sup>C NMR

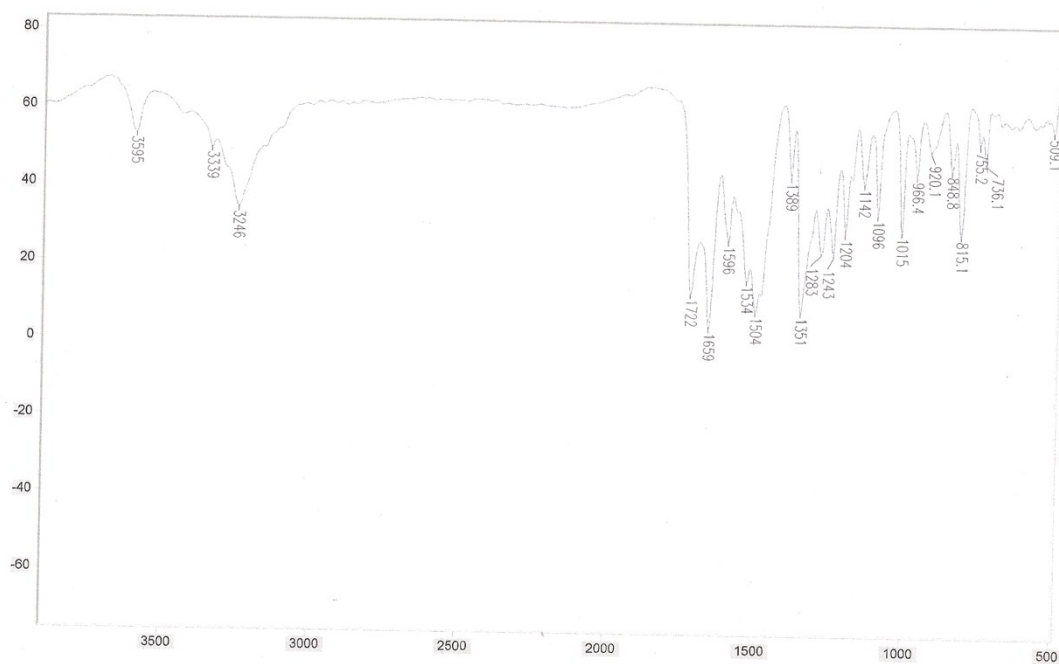

Figure S3. Compound 9a (LASSBio-1491) IR

E:\20190211\_Analise padroes\1491

03/15/19 08:31:55

1491 #45-71 RT: 0.30-0.47 AV: 14 SM: 7G NL: 2.81E6  
T: FTMS + p ESI Full ms [60.0000-800.0000]

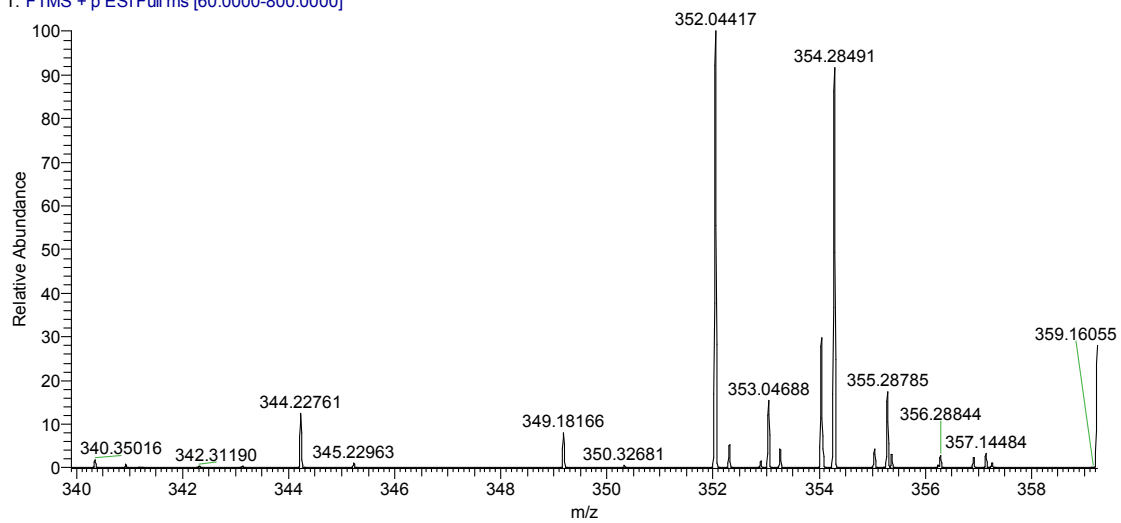

Figure S4. Compound 9a (LASSBio-1491) HRMS

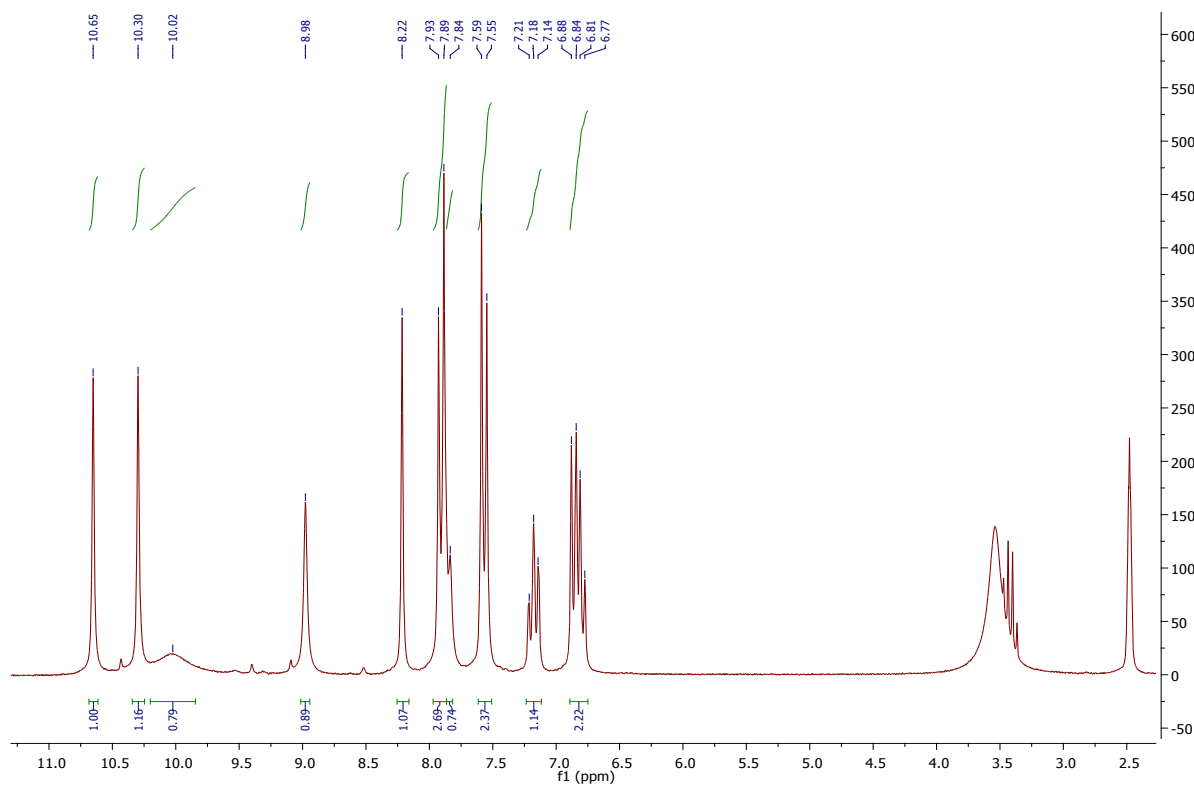Figure S5. Compound 9b (LASSBio-1704) <sup>1</sup>H NMR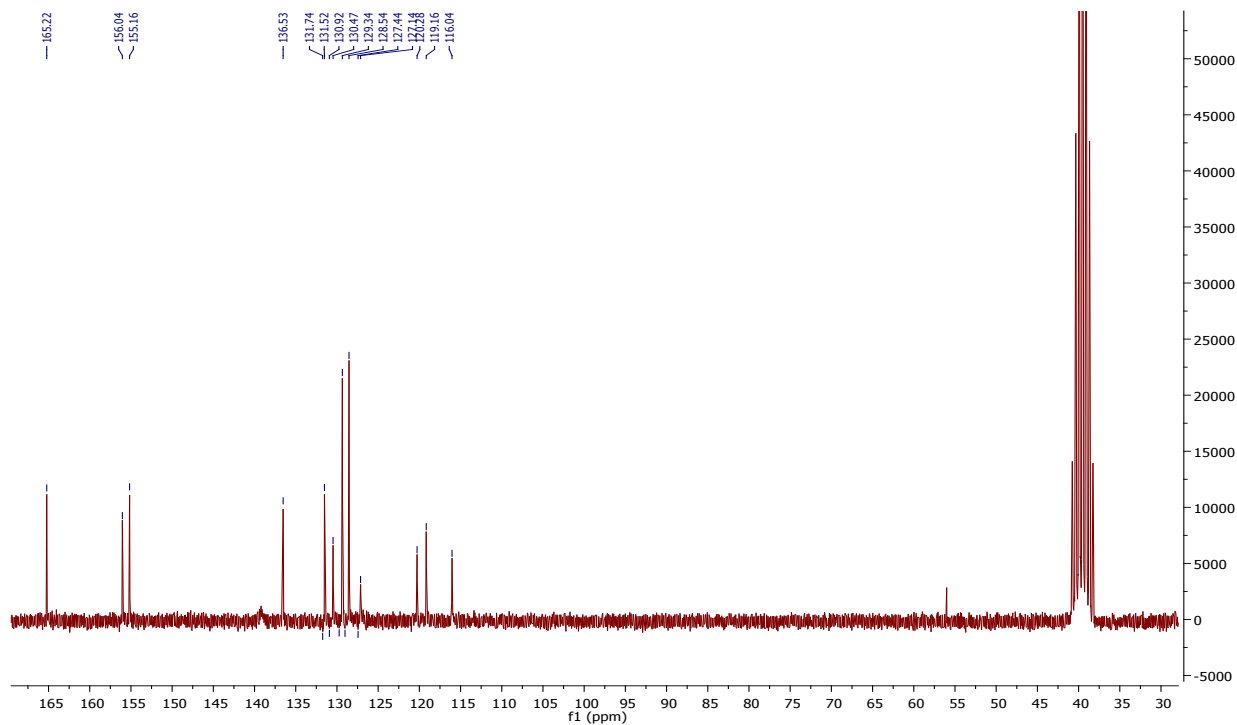Figure S6. Compound 9b (LASSBio-1704) <sup>13</sup>C NMR

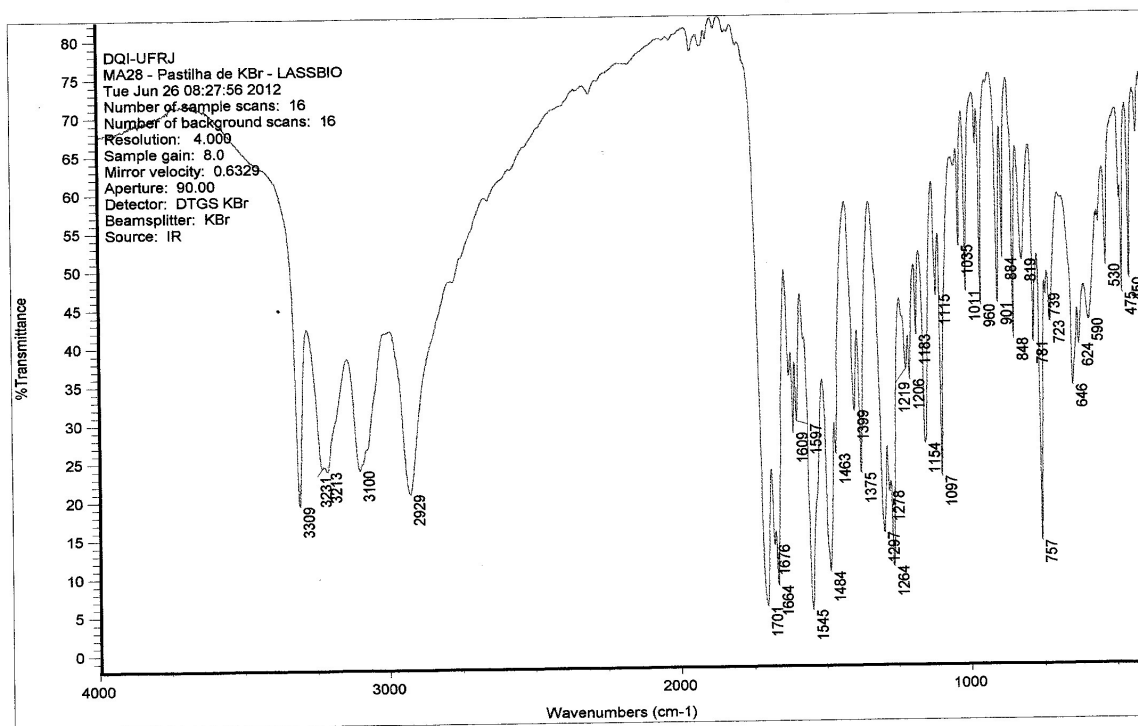

Figure S7. Compound 9b (LASSBio-1704) IR

C:\Users\...\LASSBio\Mestrado\HRMS\1704

11/27/18 12:48:29

1704 #28-37 RT: 0.20-0.26 AV: 5 SM: 7G NL: 7.22E5  
T: FTMS + p ESI Full ms [150.0000-800.0000]

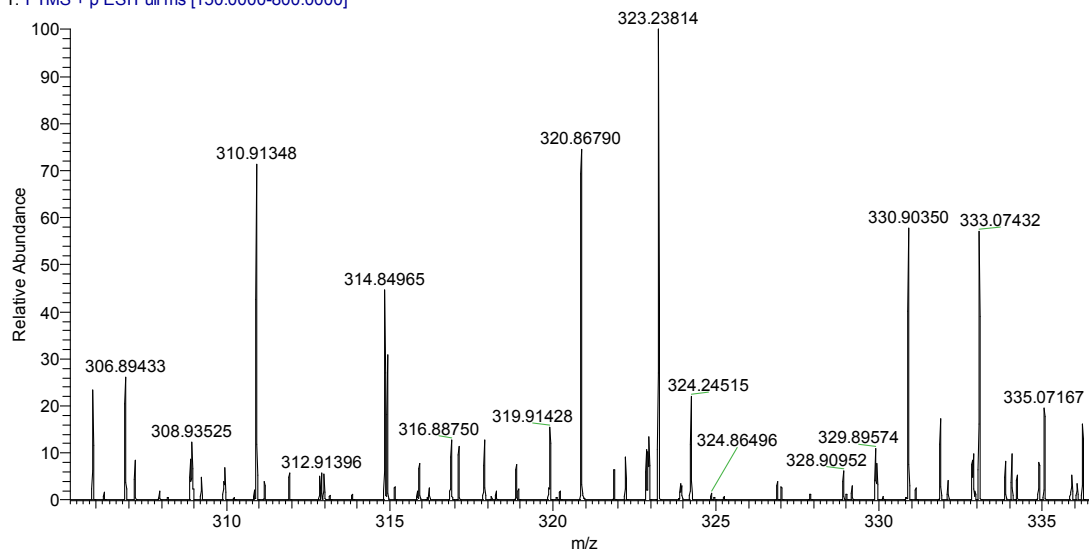

Figure S8. Compound 9b (LASSBio-1704) HRMS

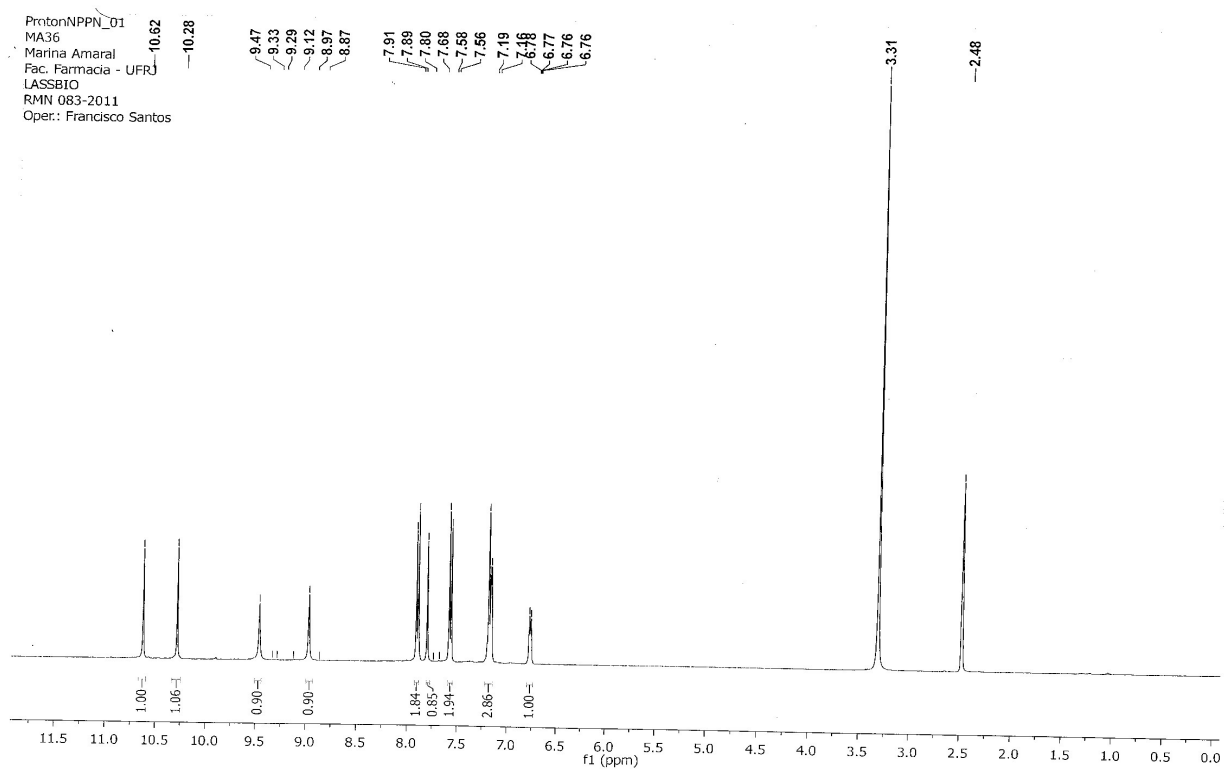Figure S9. Compound 9c (LASSBio-1709)  $^1\text{H}$  NMR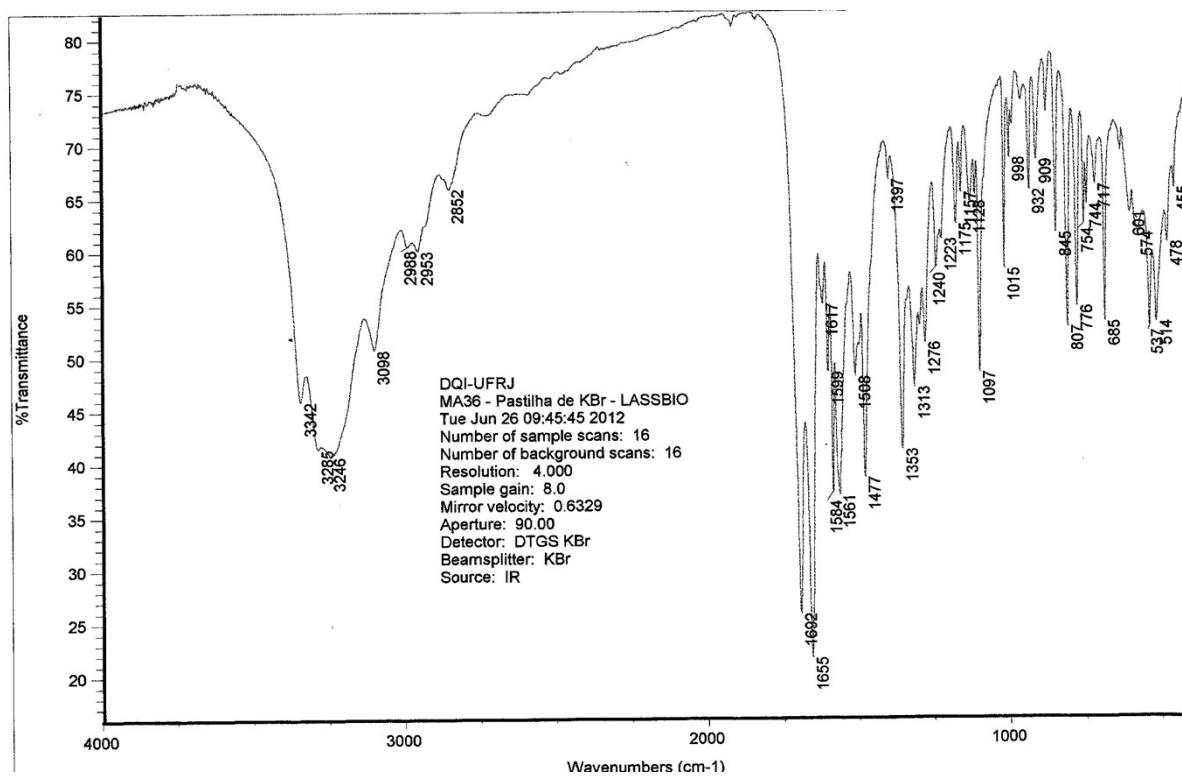

Figure S10. Compound 9c (LASSBio-1709) IR

C:\Users\...LASSBio\Mestrado\HRMS\MA36

11/27/18 13:14:35

MA36 #26-39 RT: 0.19-0.26 AV: 7 SM: 7G NL: 1.29E7  
T: FTMS + p ESI Full ms [150.0000-800.0000]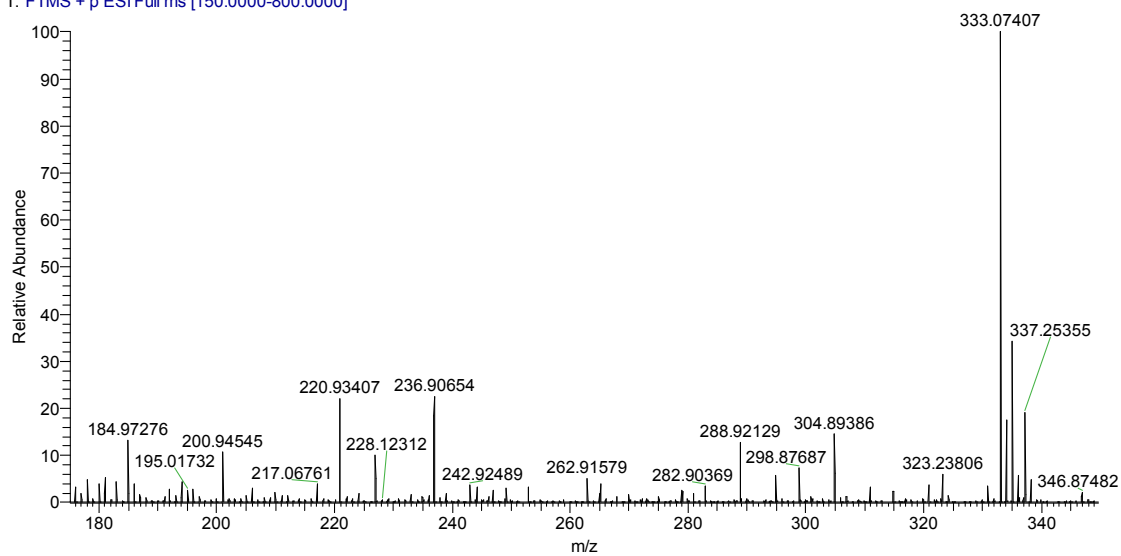

Figure S11. Compound 9c (LASSBio-1709) HRMS

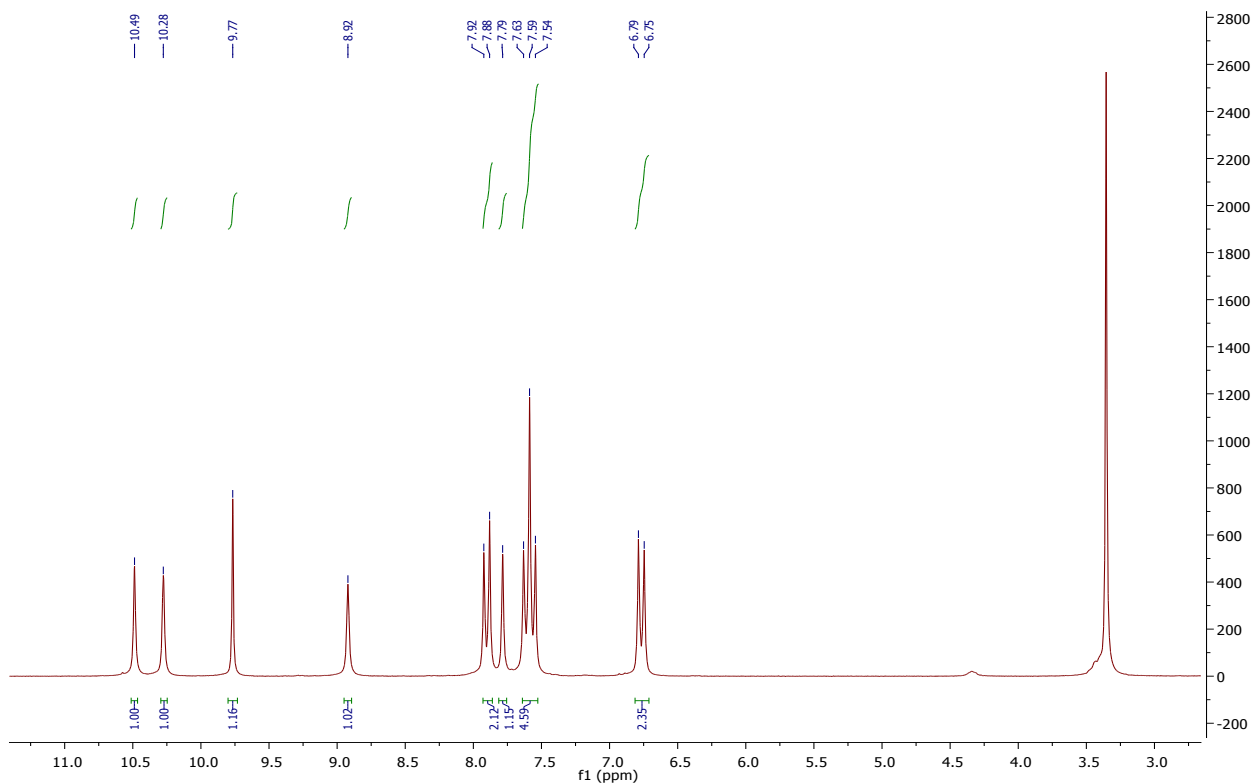Figure S12. Compound 9d (LASSBio-1706) <sup>1</sup>H NMR

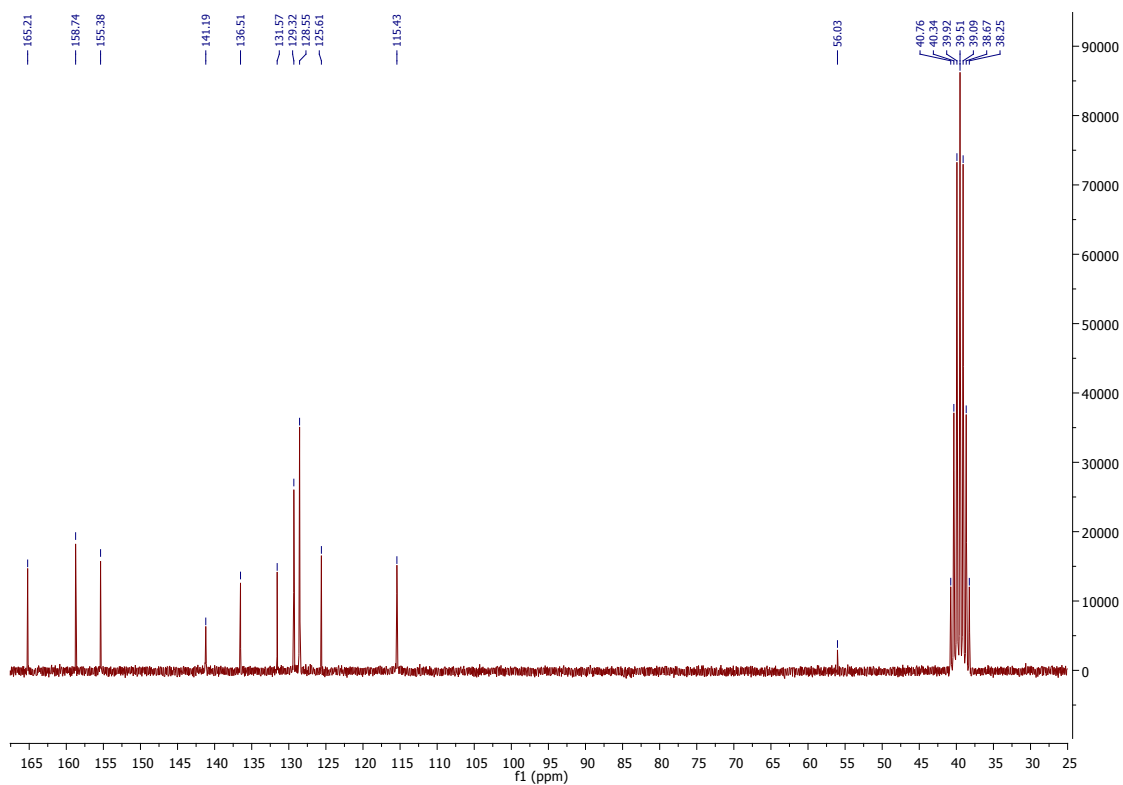Figure S13. Compound 9d (LASSBio-1706) <sup>13</sup>C NMR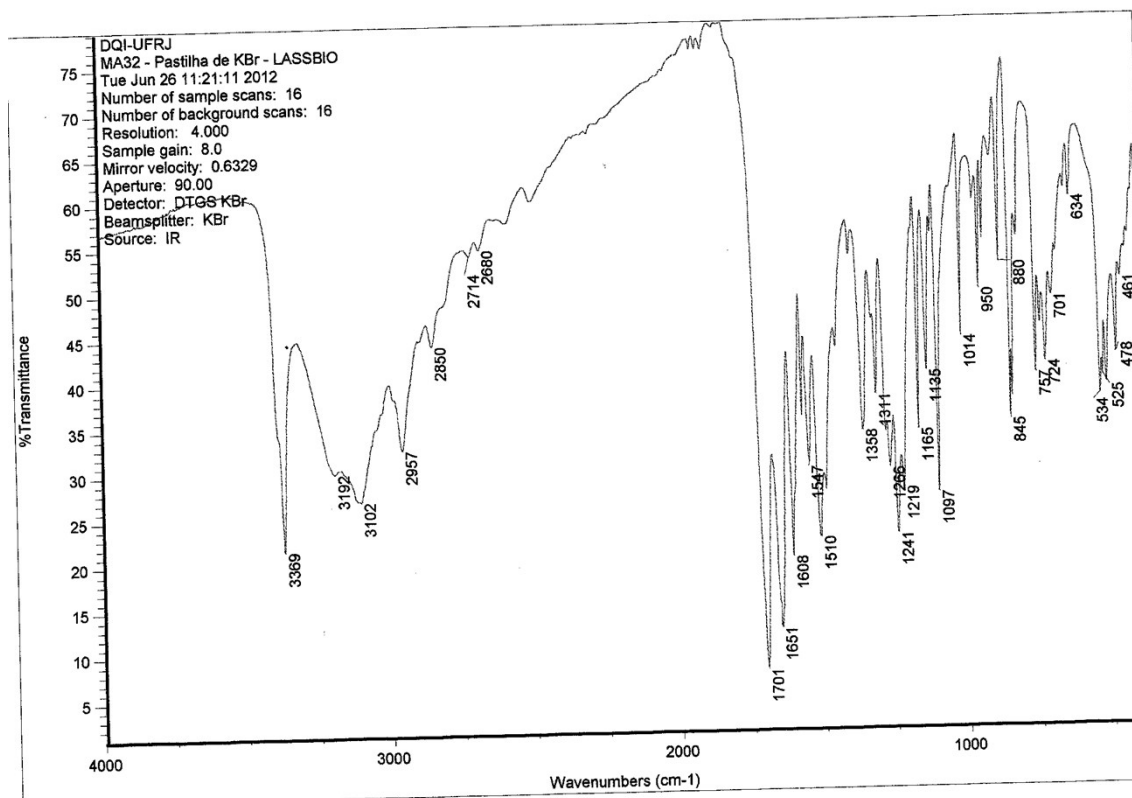Figure S14. Compound 9d (LASSBio-1706) <sup>13</sup>C NMR



C:\Users\...LASSBio\Mestrado\HRMS\1706

11/27/18 12:35:22

1706 #28-36 RT: 0.20-0.24 AV: 4 SM: 7G NL: 6.71E6  
T: FTMS + p ESI Full ms [150.0000-800.0000]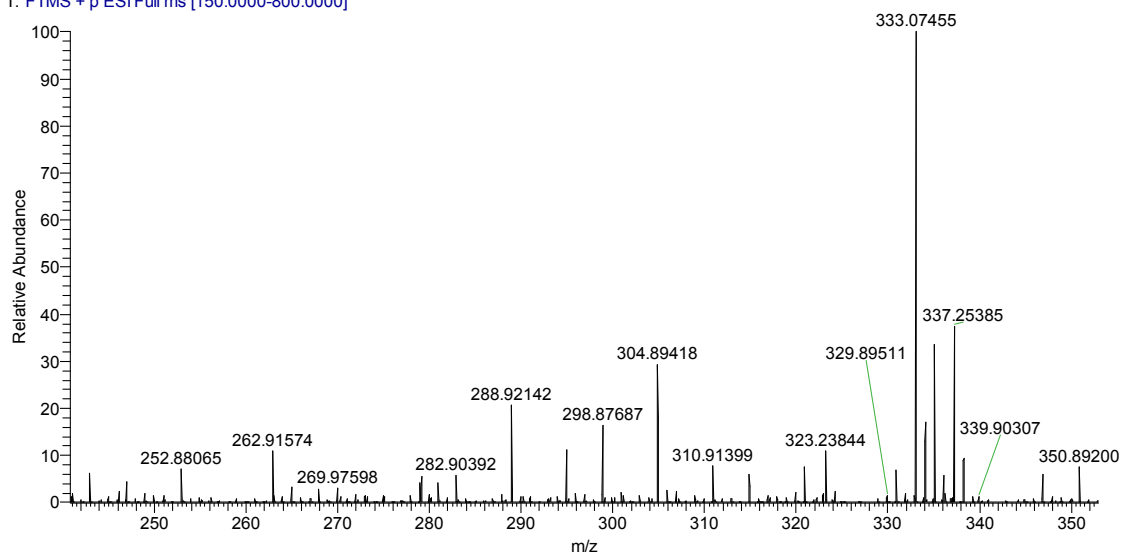

Figure S15. Compound 9d (LASSBio-1706) HRMS

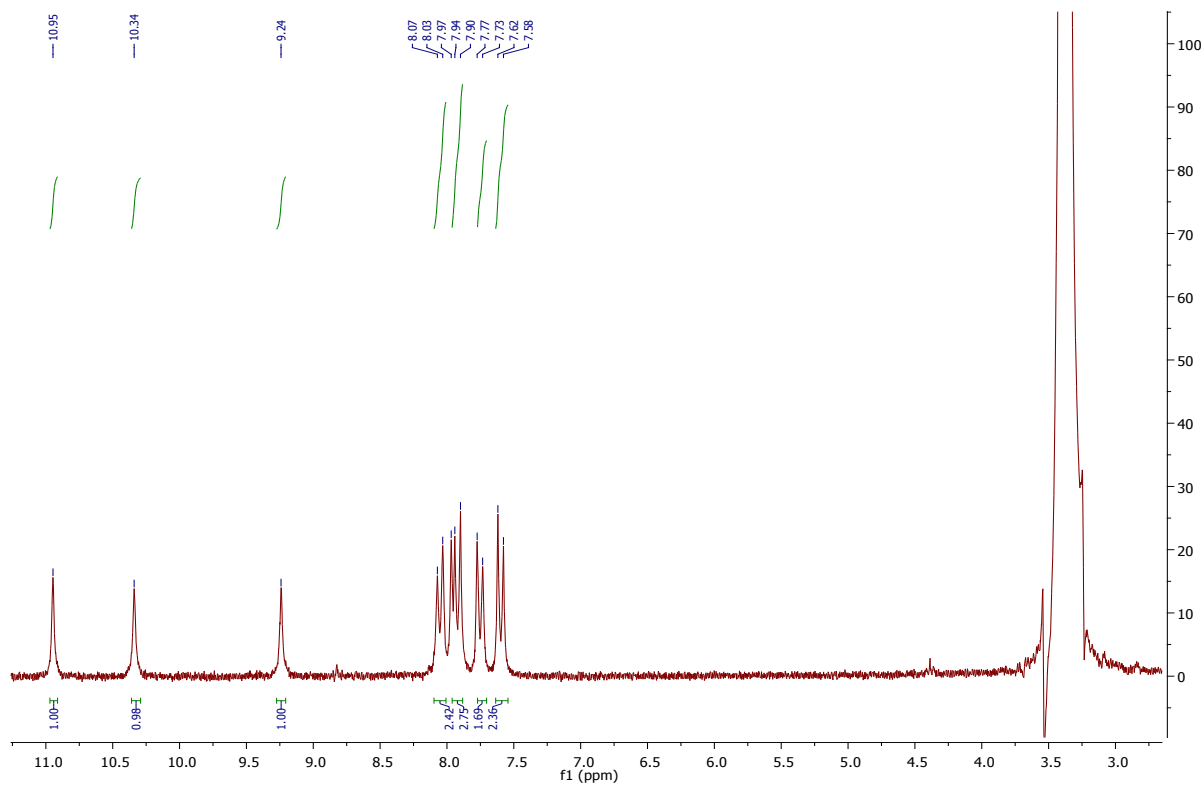Figure S16. Compound 9e (LASSBio-1737) <sup>1</sup>H NMR

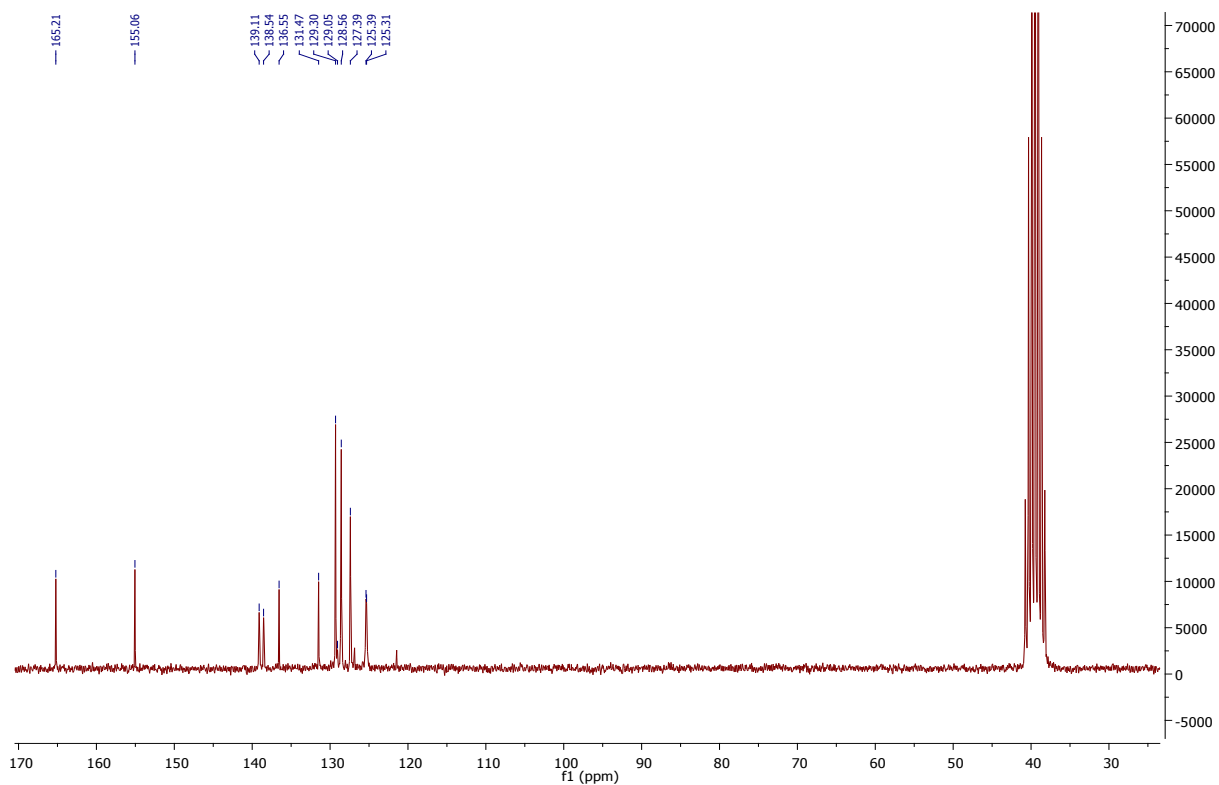Figure S17. Compound 9e (LASSBio-1737)  $^{13}\text{C}$  NMR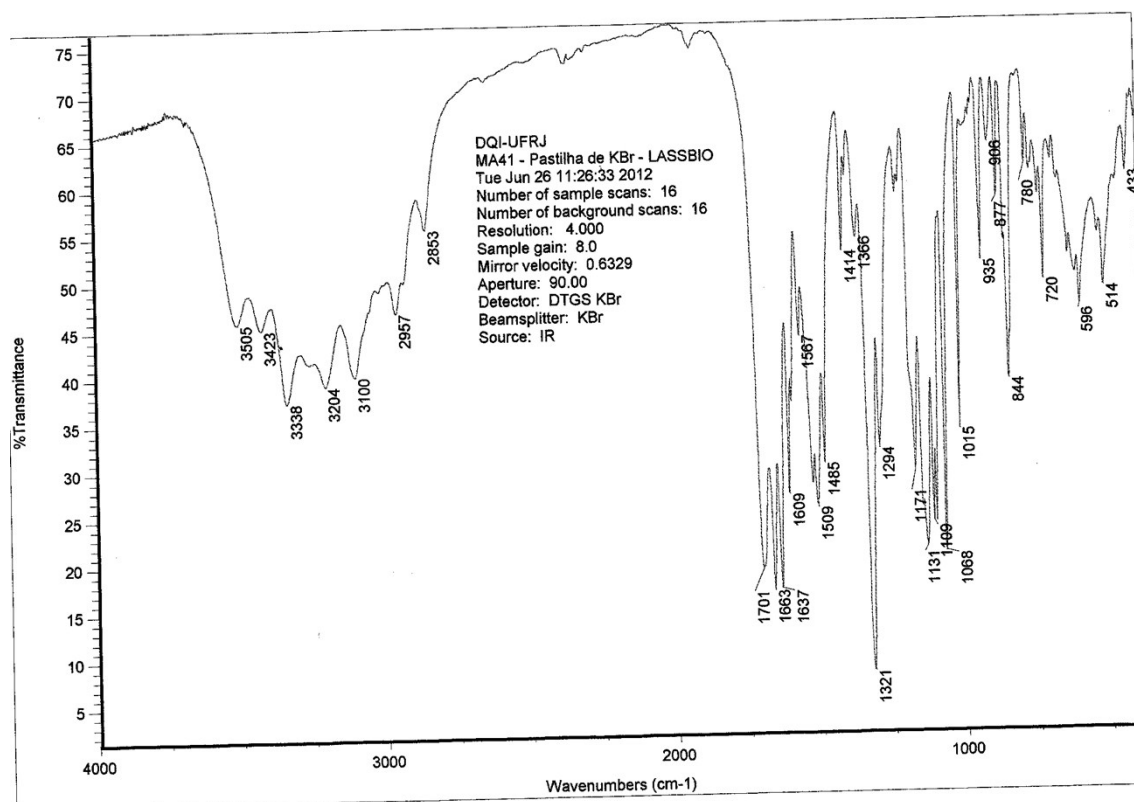

Figure S18. Compound 9e (LASSBio-1737) IR

C:\Users\...LASSBio\Mestrado\HRMS\MA41

11/27/18 13:21:05

MA41 #23-35 RT: 0.16-0.24 AV: 7 SM: 7G NL: 3.12E7  
T: FTMS + p ESI Full ms [150.0000-800.0000]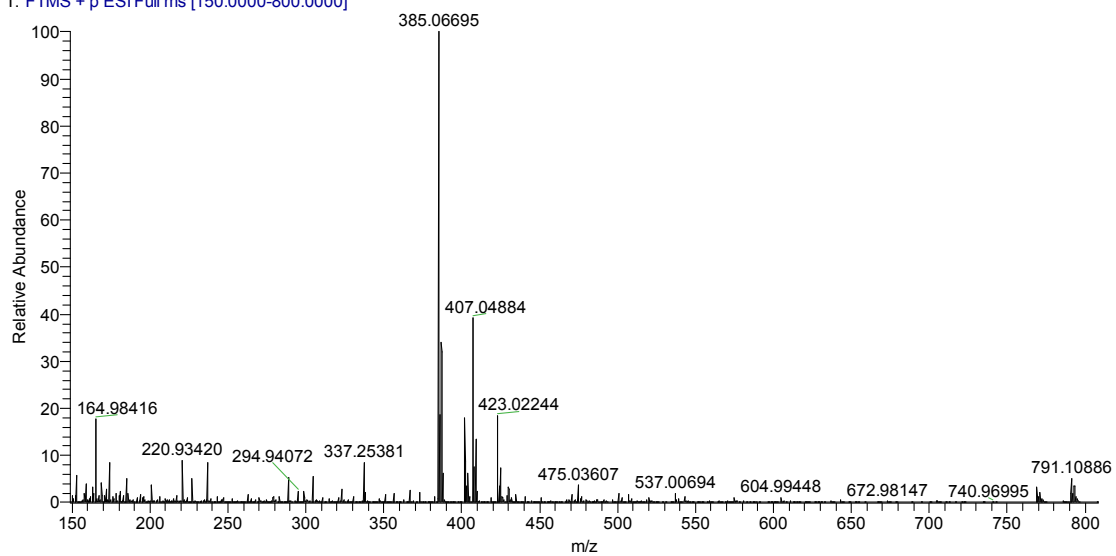

Figure S19. Compound 9e (LASSBio-1737) HRMS

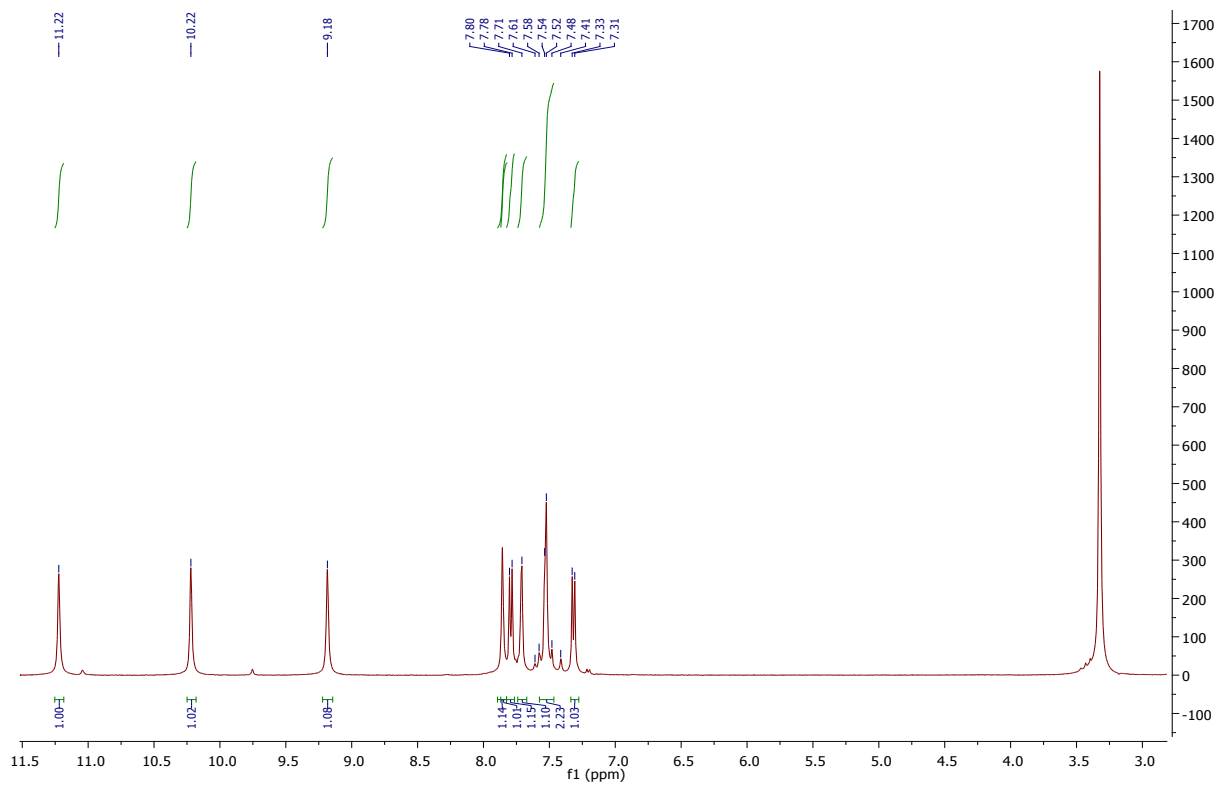Figure S20. Compound 10a (LASSBio-1703)  $^1\text{H}$  NMR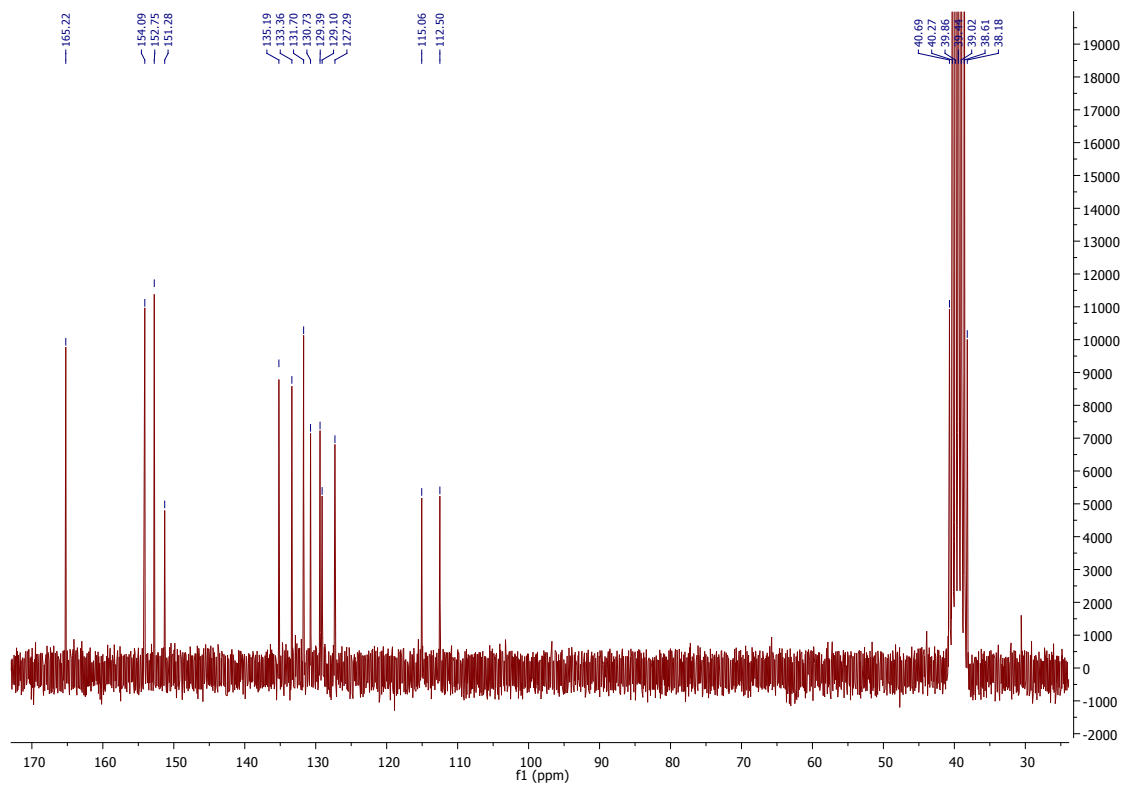Figure S21. Compound 10a (LASSBio-1703)  $^{13}\text{C}$  NMR

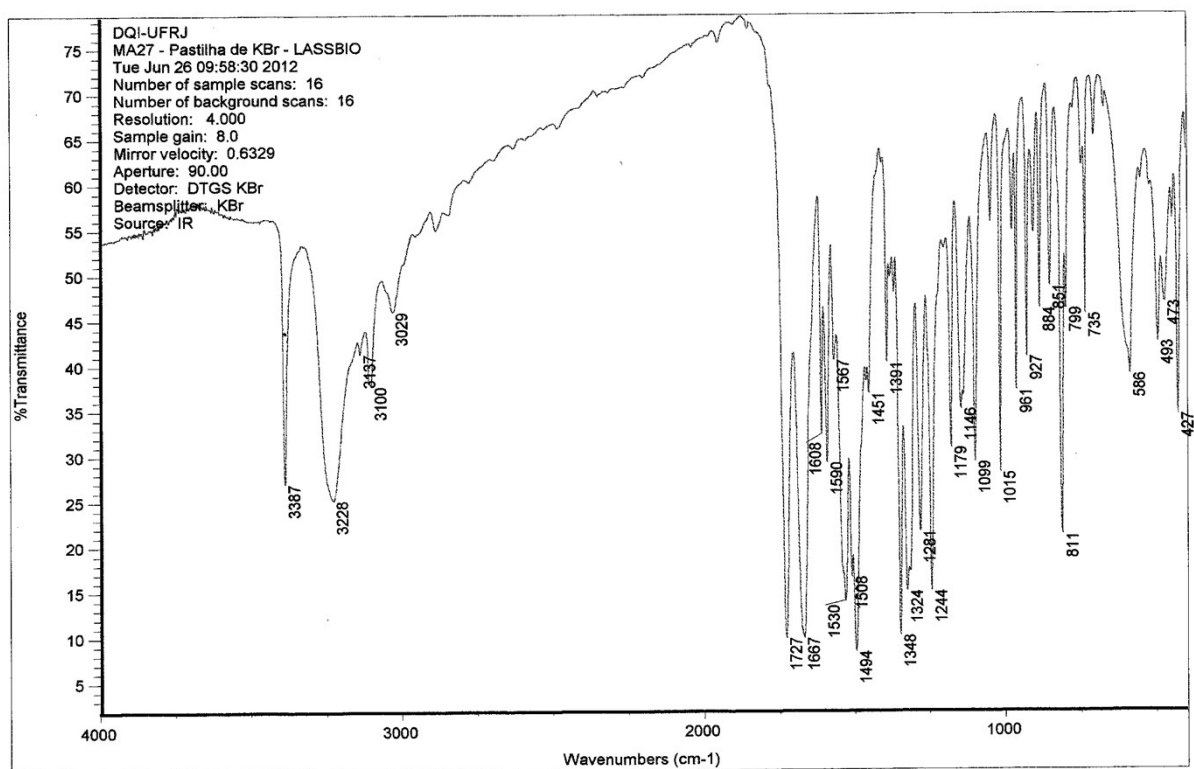

Figure S22. Compound 10a (LASSBio-1703) IR

E:\20190211\_Analise padroes\1703

03/15/19 08:39:04

1703 #41-59 RT: 0.27-0.39 AV: 10 SM: 7G NL: 6.58E6  
T: FTMS + p ESI Full ms [60.0000-800.0000]

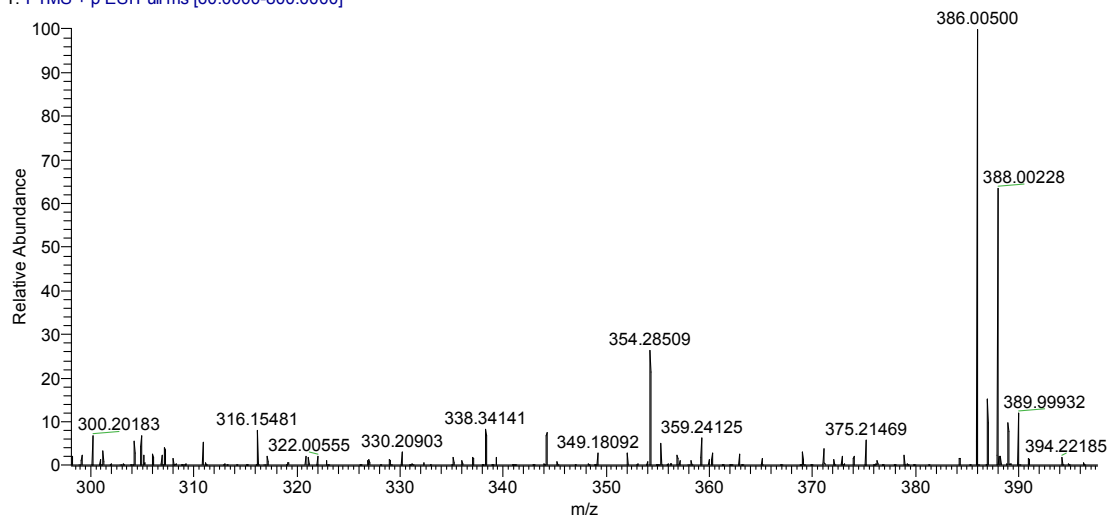

Figure S23. Compound 10a (LASSBio-1703) HRMS

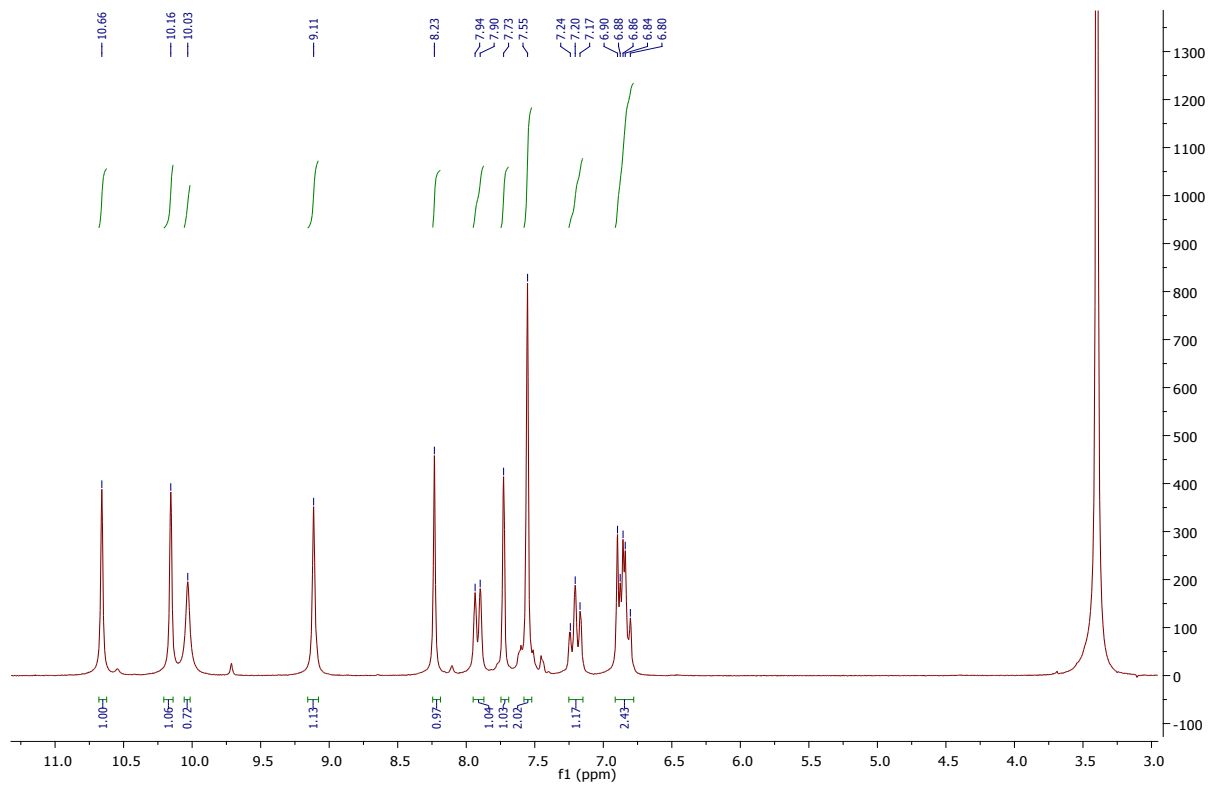Figure S24. Compound 10b (LASSBio-1705) <sup>1</sup>H NMR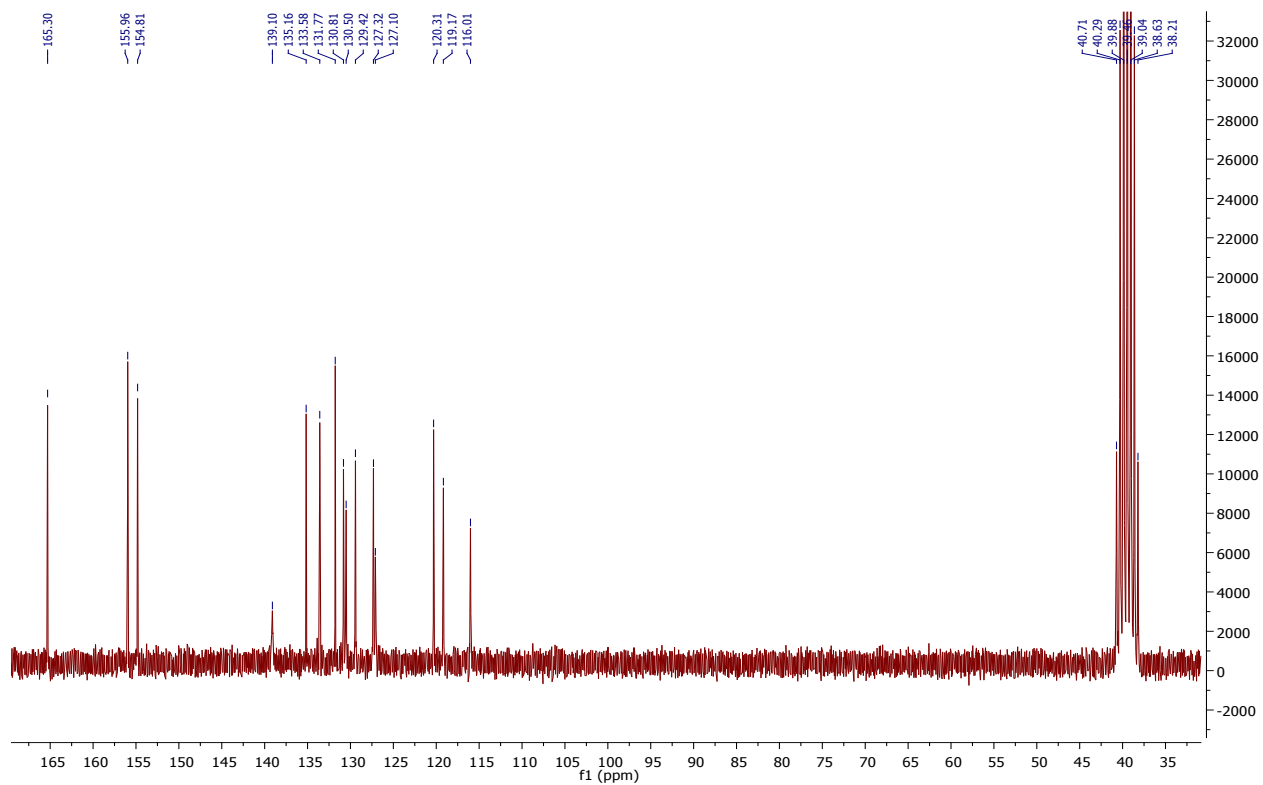Figure S25. Compound 10b (LASSBio-1705) <sup>13</sup>C NMR

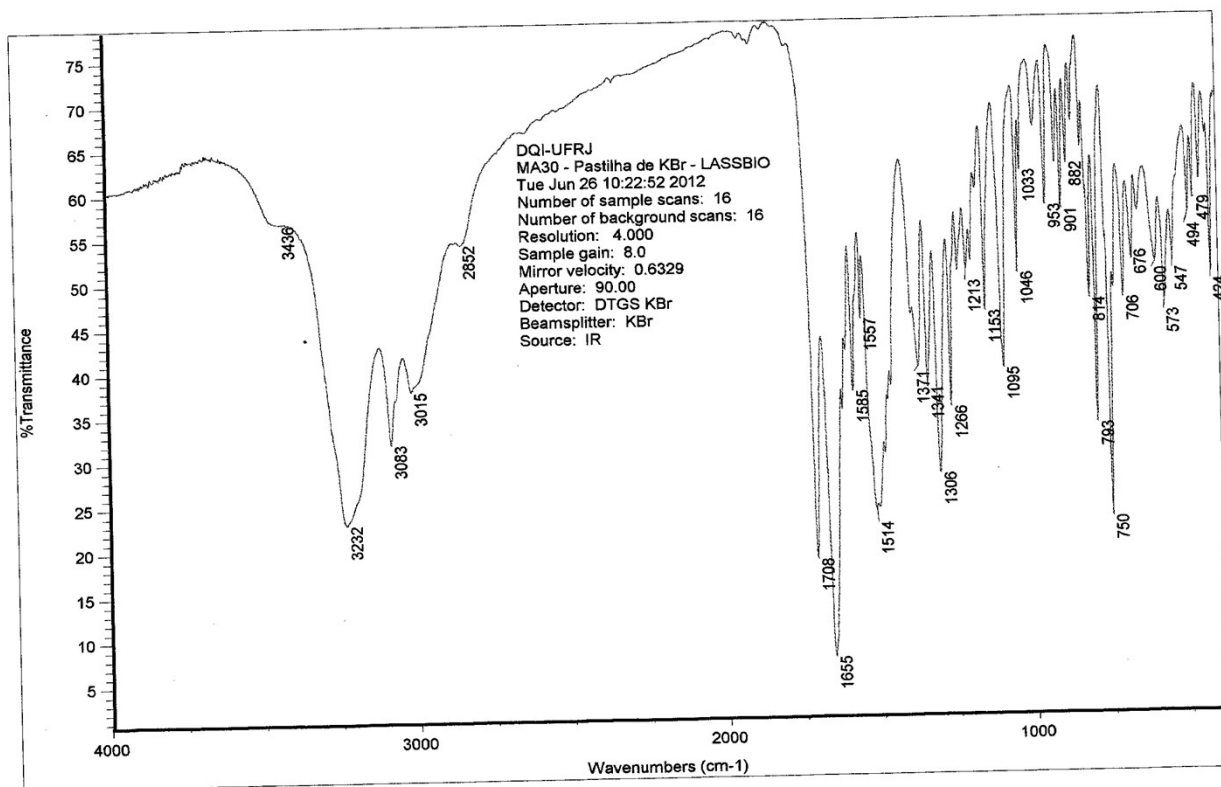

Figure S26. Compound 10b (LASSBio-1705) IR

C:\Users\...LASSBio\Mestrado\HRMS\1705

11/27/18 12:09:22

1705 #30-41 RT: 0.21-0.28 AV: 6 SM: 7G NL: 6.51E6  
T: FTMS + p ESI Full ms [150.0000-800.0000]

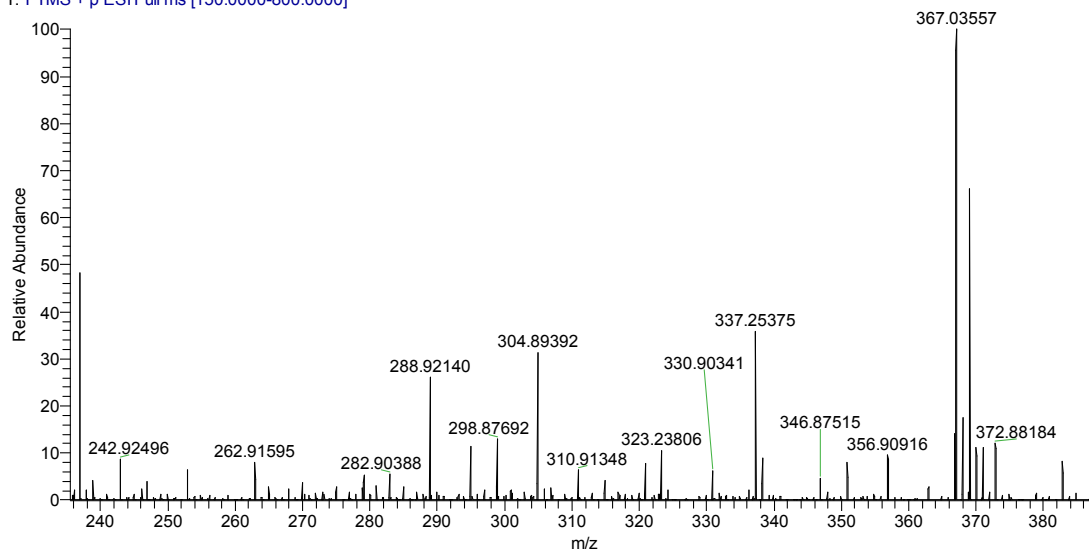

Figure S27. Compound 10b (LASSBio-1705) HRMS

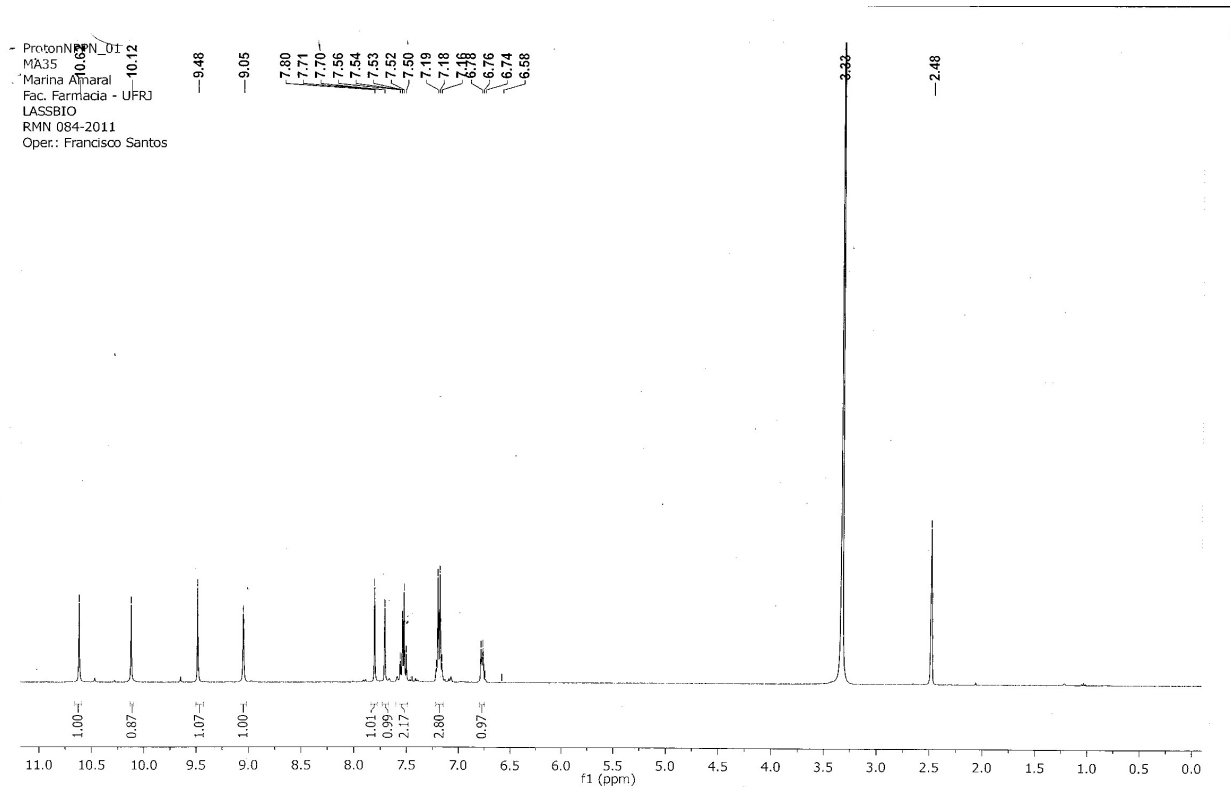Figure S28. Compound 10c (LASSBio-1708)  $^1\text{H}$  NMR

C:\Users\...LASSBio\Mestrado\HRMS\1708

11/27/18 12:55:04

1708 #29-38 RT: 0.20-0.25 AV: 5 SM: 7G NL: 3.48E6  
T: FTMS + p ESI Full ms [150.0000-800.0000]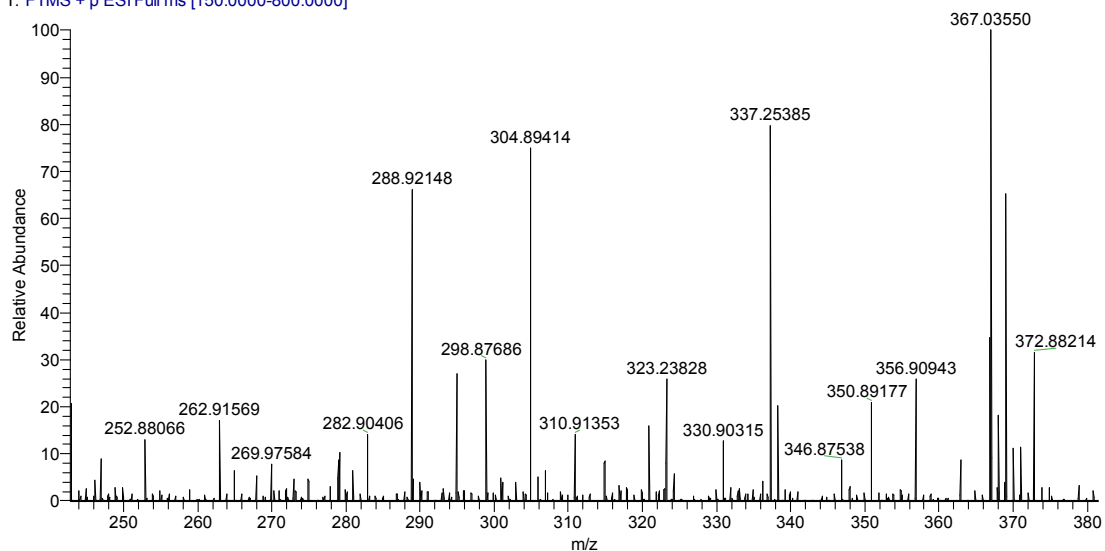

Figure S29. Compound 10c (LASSBio-1708) HRMS



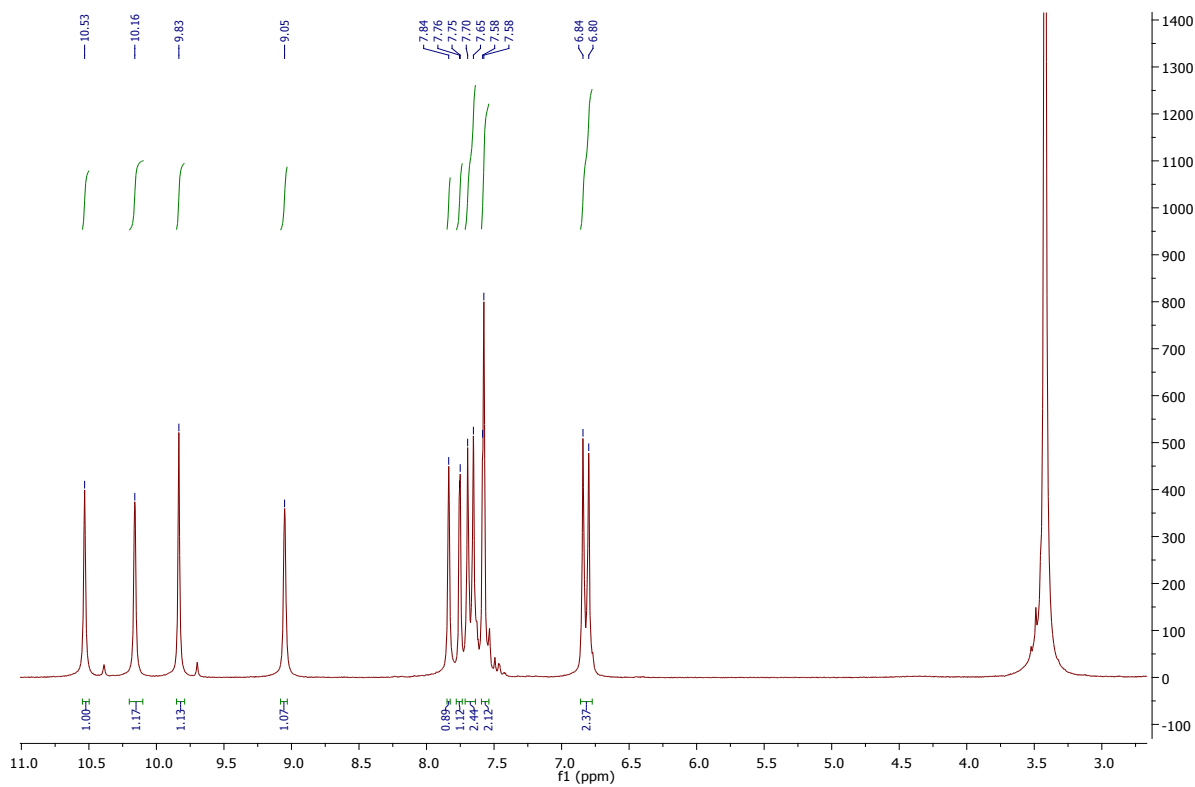Figure S30. Compound 10d (LASSBio-1707) <sup>1</sup>H NMR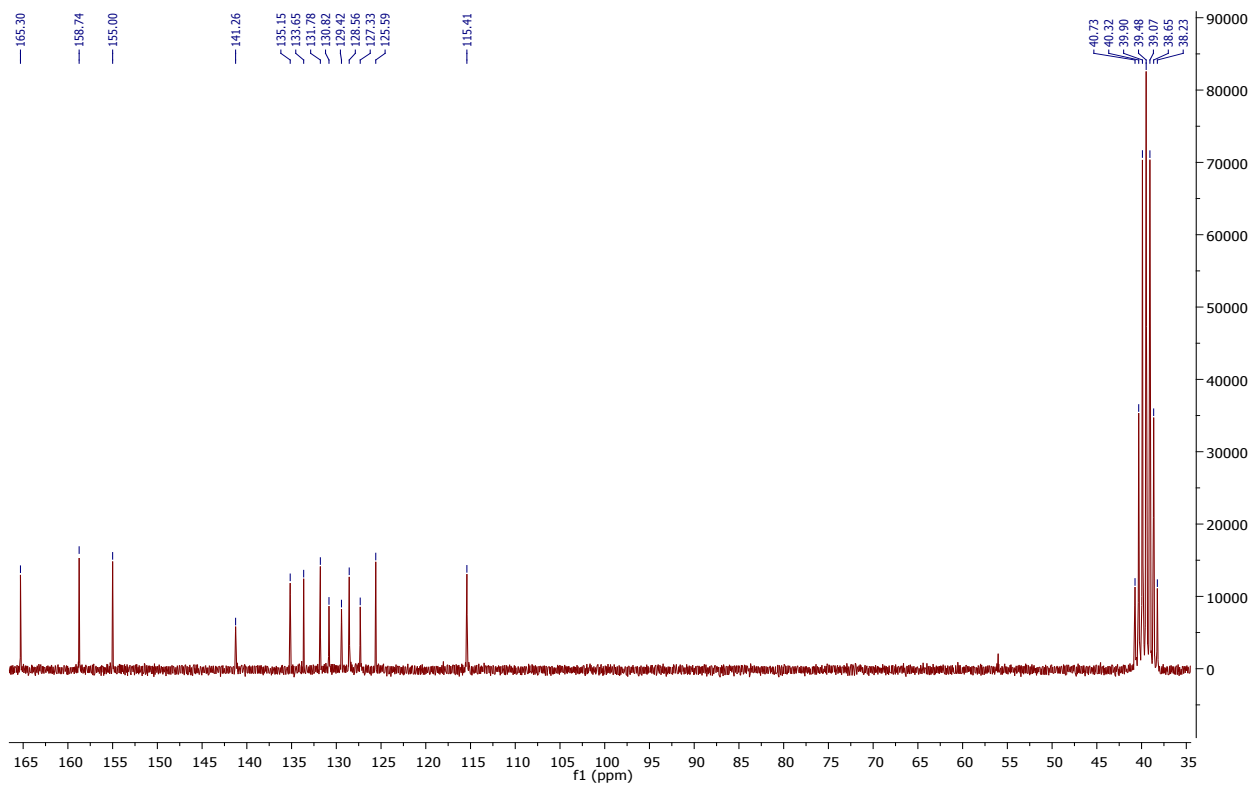Figure S31. Compound 10d (LASSBio-1707) <sup>13</sup>C NMR

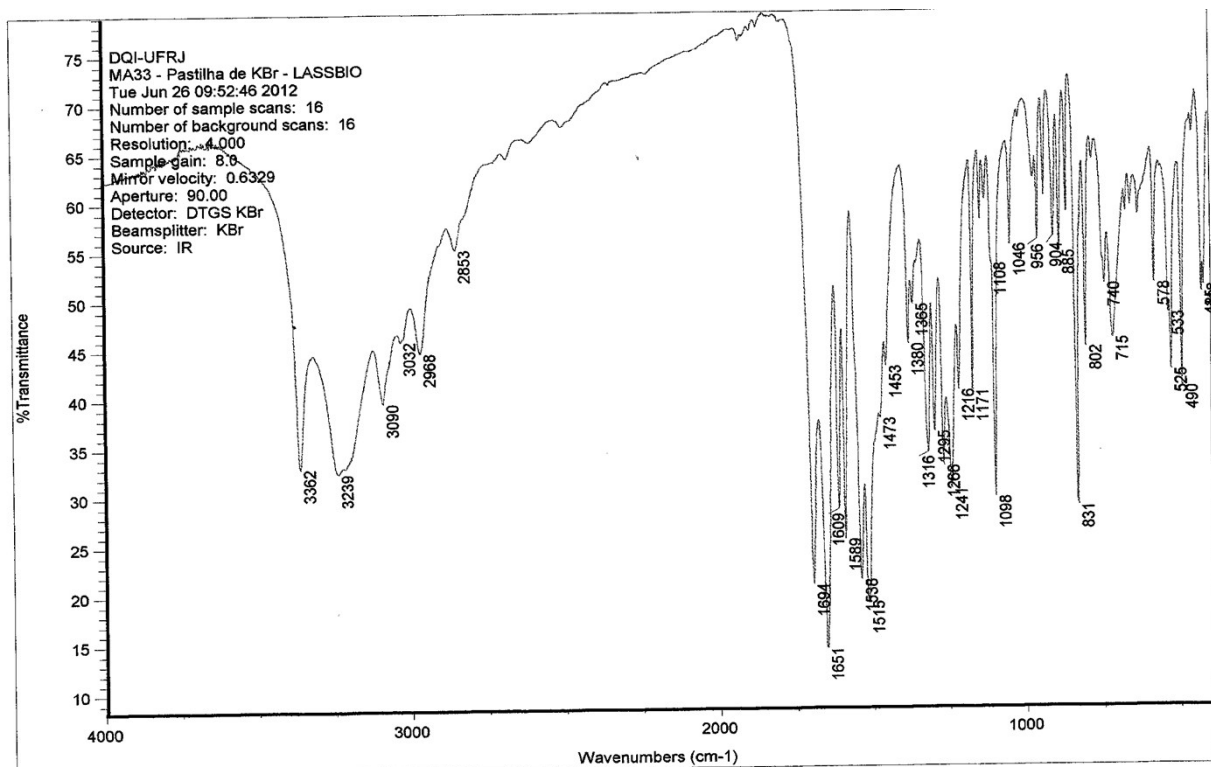

Figure S32. Compound 10d (LASSBio-1707) IR

C:\Users\...LASSBio\Mestrado\HRMS\1707

11/27/18 12:28:53

1707 #25-35 RT: 0.17-0.24 AV: 6 SM: 7G NL: 5.27E6  
T: FTMS + p ESI Full ms [150.0000-800.0000]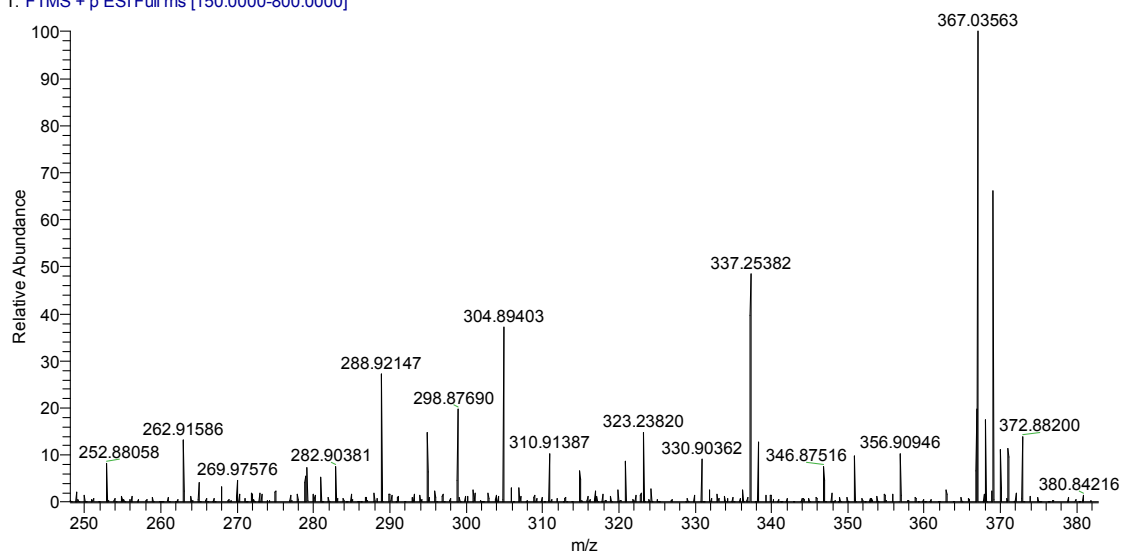

Figure S33. Compound 10d (LASSBio-1707) HRMS

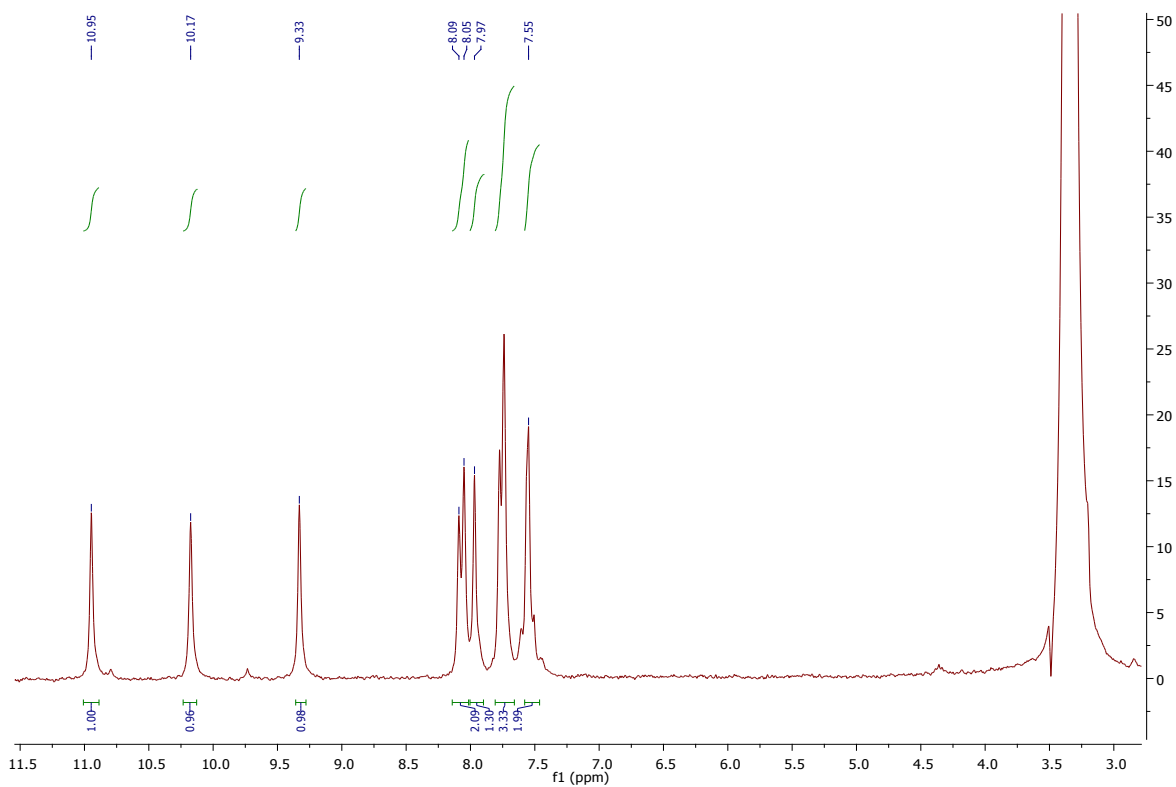Figure S34. Compound 10e (LASSBio-1736)  $^1\text{H}$  NMR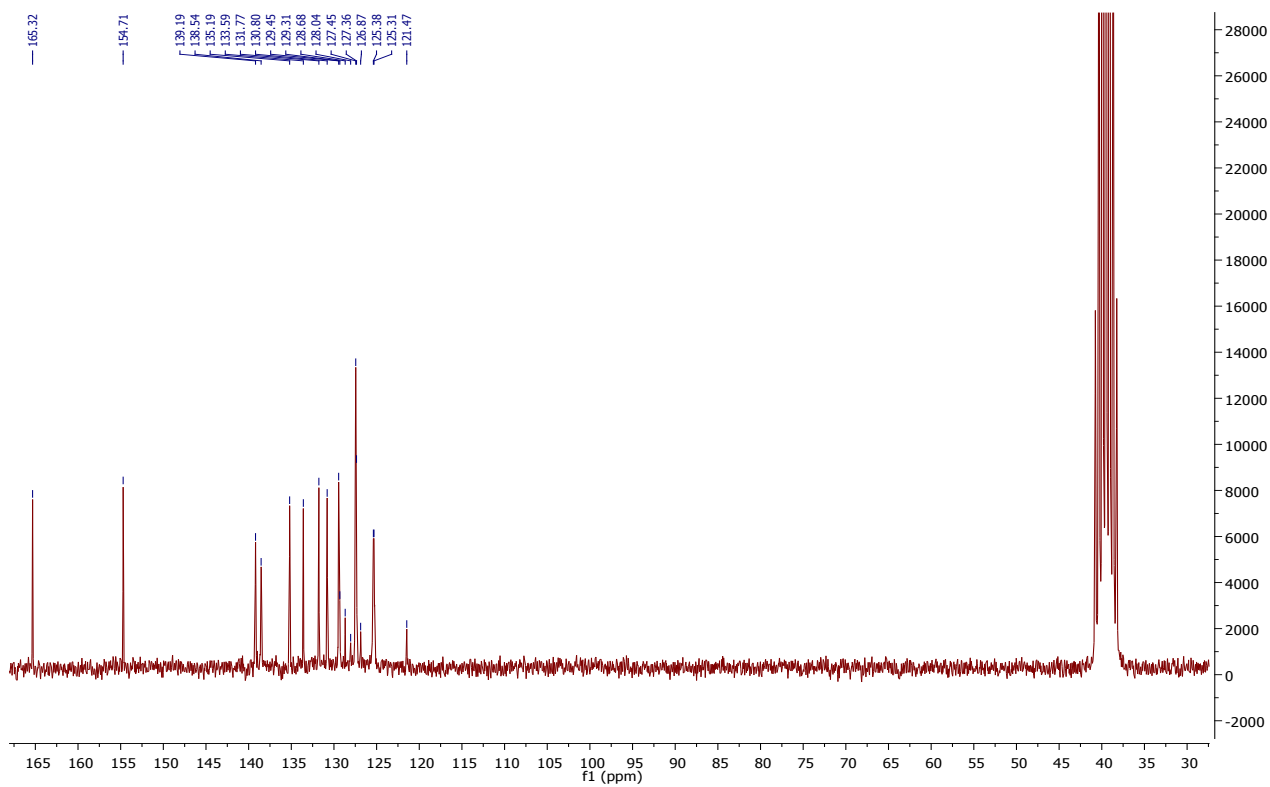

Figure S35. Compound 10e (LASSBio-1736)  $^{13}\text{C}$  NMR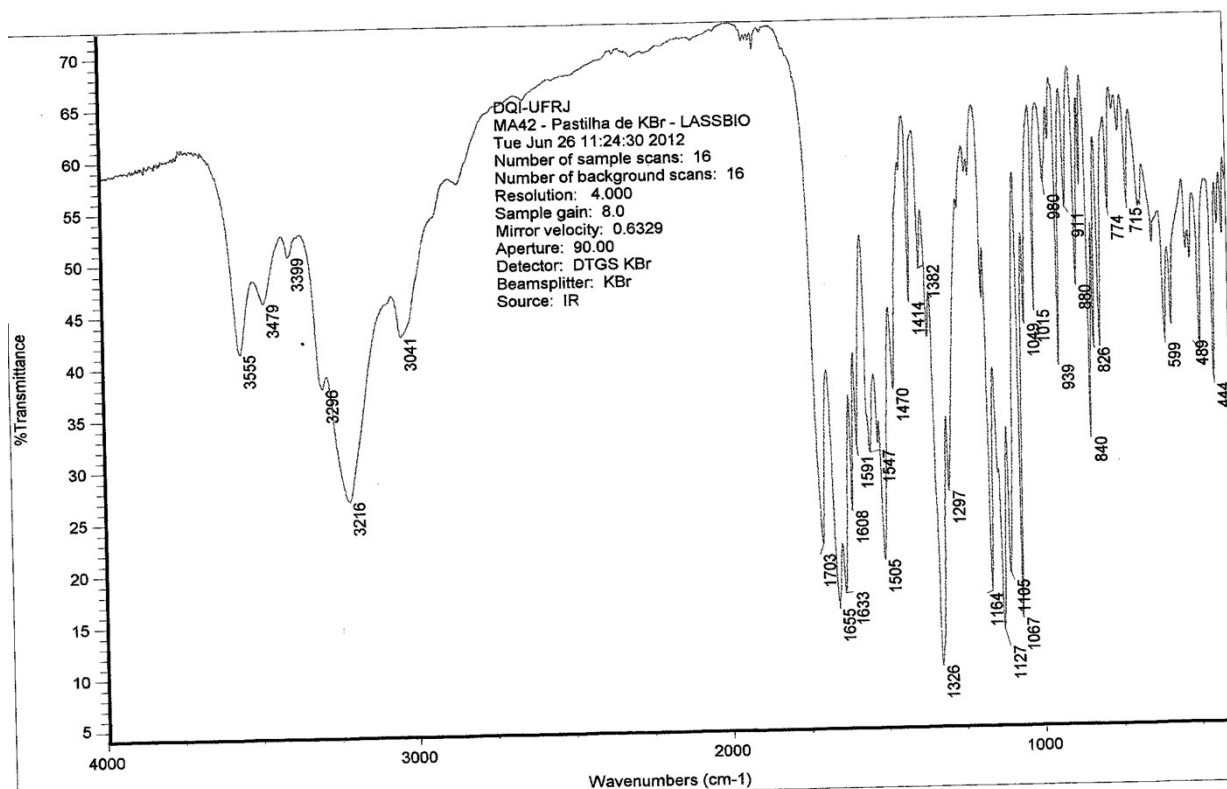

Figure S36. Compound 10e (LASSBio-1736) IR

C:\Users\...LASSBio\Mestrado\HRMS\1736

11/27/18 12:15:49

1736 #28-52 RT: 0.20-0.34 AV: 12 SM: 7G NL: 1.89E7  
T: FTMS + p ESI Full ms [150.0000-800.0000]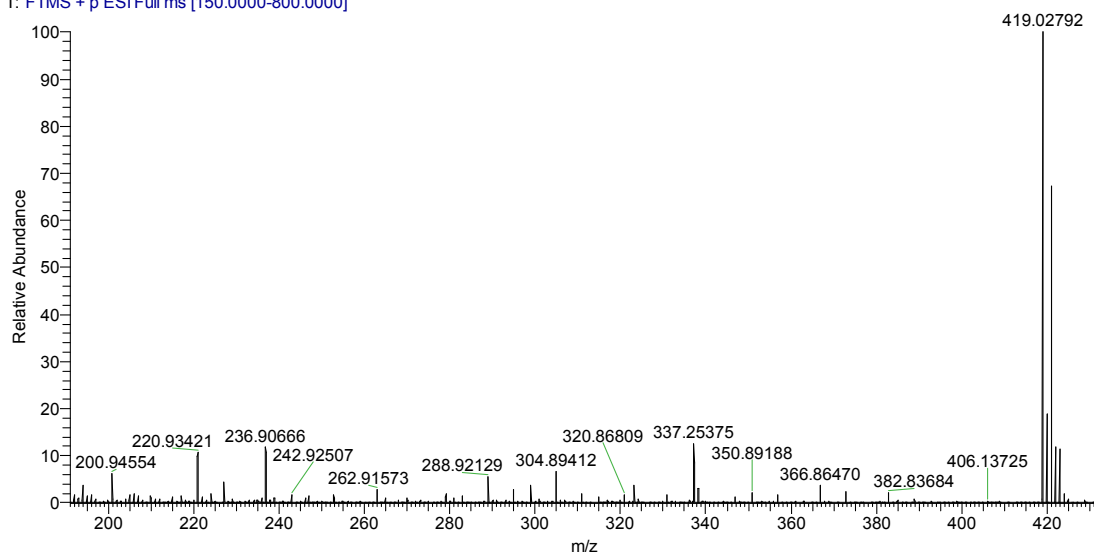

Figure S37. Compound 10e (LASSBio-1736) HRMS

Table S1. Crystal data and refinement parameters of compound 9a (LASSBio-1491).

|                                                  |                                                                                                    |           |
|--------------------------------------------------|----------------------------------------------------------------------------------------------------|-----------|
| structural formula                               | (C <sub>13</sub> H <sub>10</sub> ClN <sub>5</sub> O <sub>5</sub> ) <sub>2</sub> (H <sub>2</sub> O) |           |
| fw (g/mol)                                       | 721.43                                                                                             |           |
| cryst syst                                       | monoclinic                                                                                         |           |
| space group                                      | <i>P2<sub>1</sub>/c</i>                                                                            |           |
| <i>Z</i> / <i>Z'</i>                             | 4/2                                                                                                |           |
| <i>T</i> (K)                                     | 296(2)                                                                                             |           |
| unit cell dimensions                             | <i>a</i> (Å)                                                                                       | 11.666(5) |
|                                                  | <i>b</i> (Å)                                                                                       | 8.002(5)  |
|                                                  | <i>c</i> (Å)                                                                                       | 33.179(5) |
|                                                  | $\beta$ (°)                                                                                        | 99.513(5) |
| <i>V</i> (Å <sup>3</sup> )                       | 3055(2)                                                                                            |           |
| calculated density (Mg/m <sup>3</sup> )          | 1.569                                                                                              |           |
| absorption coefficient $\mu$ (mm <sup>-1</sup> ) | 0.291                                                                                              |           |
| $\theta$ range for data collection (°)           | 3.101 to 26.154                                                                                    |           |
| index ranges                                     | <i>h</i>                                                                                           | -13 to 13 |
|                                                  | <i>k</i>                                                                                           | -8 to 9   |
|                                                  | <i>l</i>                                                                                           | -39 to 39 |
| data collected                                   | 35580                                                                                              |           |
| unique reflections                               | 5317                                                                                               |           |
| unique reflections with $I > 2\sigma(I)$         | 2282                                                                                               |           |
| symmetry factor ( $R_{\text{int}}$ )             | 0.1930                                                                                             |           |
| completeness to $\theta_{\text{max}}$ (%)        | 97.3                                                                                               |           |
| <i>F</i> (000)                                   | 1480                                                                                               |           |
| parameters refined                               | 468                                                                                                |           |
| goodness-of-fit on $F^2$                         | 0.952                                                                                              |           |

|                                                |                  |
|------------------------------------------------|------------------|
| final $R1$ factor for $I > 2\sigma(I)$         | 0.0594           |
| final $wR2$ factor for all data                | 0.1689           |
| largest diff. peak / hole ( $e/\text{\AA}^3$ ) | 0.220 and -0.256 |
| CCDC deposit number                            | 1824217          |

---

#### Chemical stability pH 7.4

In a 10 mL tube, 5  $\mu\text{L}$  (250 ng/mL) of LASSBio-1736 (10e) (stock concentration = 10000 ng/mL solubilized in DMSO) was added in 195  $\mu\text{L}$  of PBS (pH=7.4), and the mixture was placed in a shaker at 37°C under vigorous stirring for 0 and 240 minutes. After each reaction time, the mixture was submitted to a liquid-liquid extraction method with 800  $\mu\text{L}$  TBME (tert-Butyl methyl ether)/ ethyl acetate (1:1) containing 100 ng/mL of ketoconazole (internal standard) which were then vortexed for 1 minute. The samples extracted were then centrifuged at 3000 rpm for 5 minutes and transferred 500  $\mu\text{L}$  of the organic phases to clean microtubes and evaporated under a nitrogen stream at 40 °C. The samples were resuspended with 100  $\mu\text{L}$  of a methanol:water mixture (7:3) containing and were placed in 2 mL vials, and analyzed by UPLC-MS.

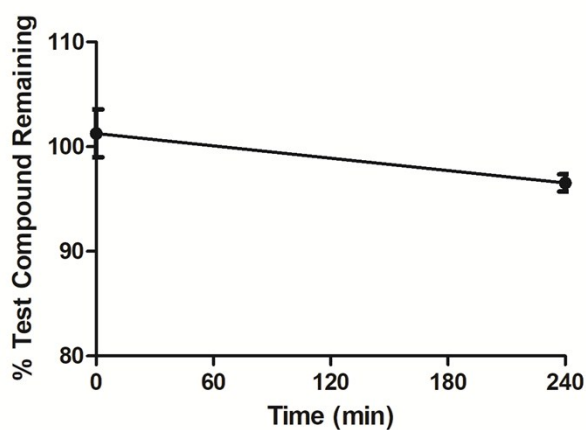

Figure S38. Chemical stability of 10e (LASSBio-1736). Data were analyzed by UPLC-MS and obtained through the compound recovery percentage expressed as mean  $\pm$  standard error average of triplicates of a representative experiment.
